# Supplementary material
Source: Springer Nature journal article supplement (https://www.springermedizin.de/resource/supplementary/12974_2008_172_MOESM2_ESM.pdf/9600958)

# NSE serum levels

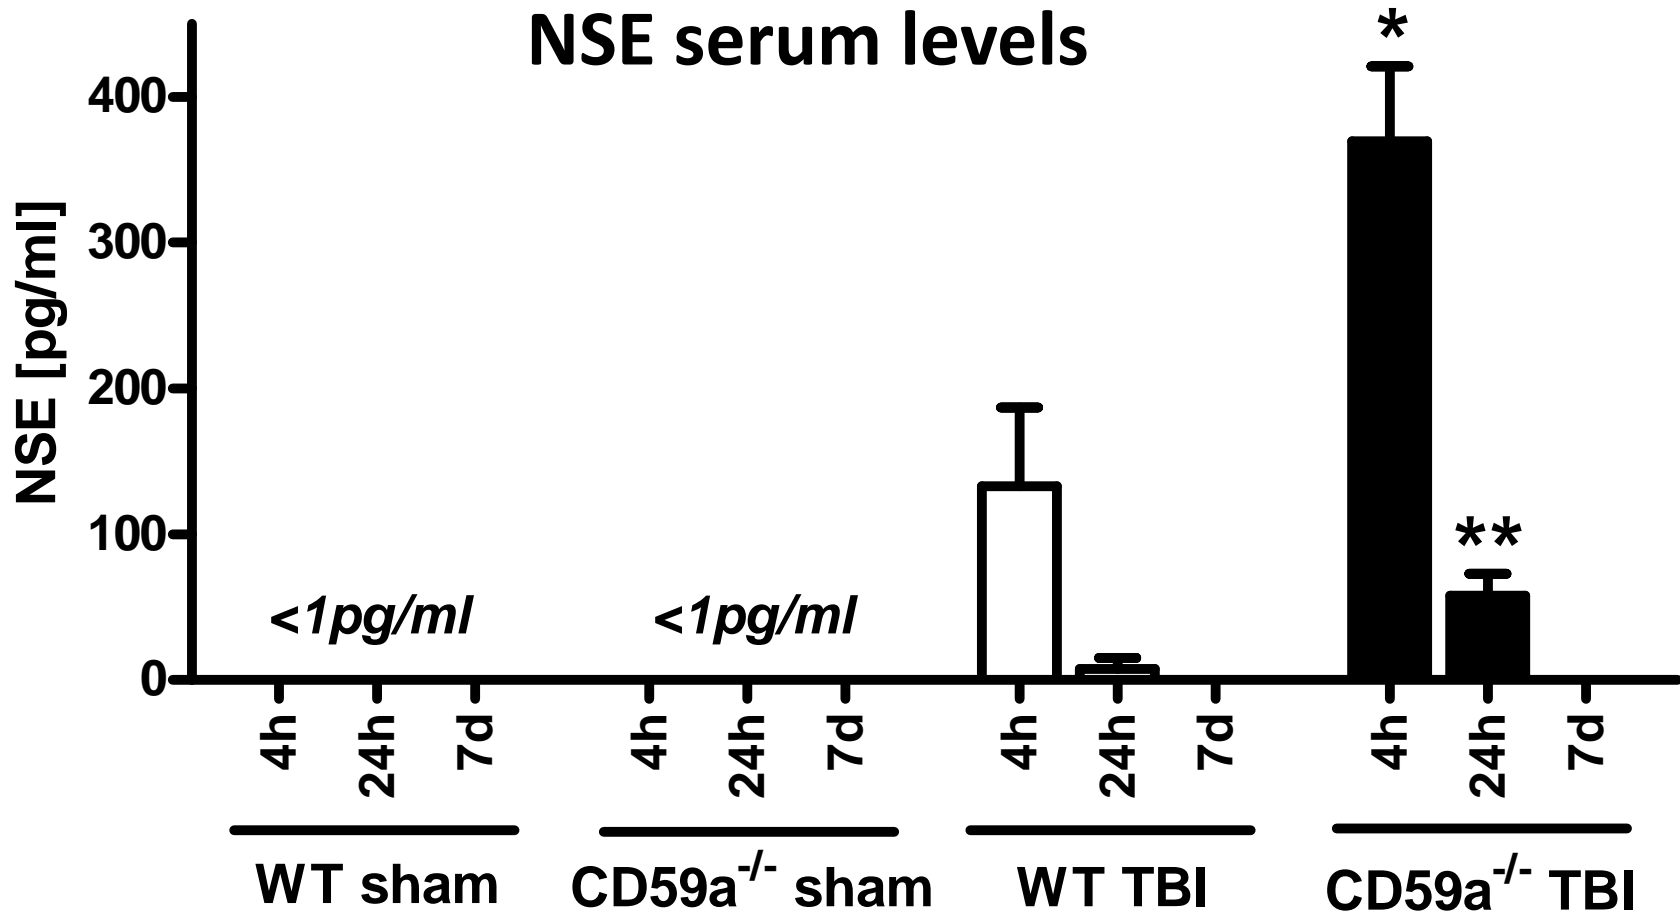

Supplement: MOESM2 [file 9600958]
